# Supplementary material
Source: Springer Nature journal article supplement (https://www.springermedizin.de/resource/supplementary/12890_2013_656_MOESM3_ESM.pdf/9505604)

**A**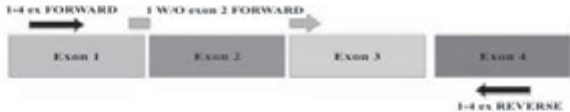**B**

EXON 1-4 339 bp

EXON 2 skipping 207 bp

ACTIN 290 bp

| MK<br>100 bp | HTZ<br>186-8T/C | HTZ<br>F508del | WT/<br>WT | HTZ<br>186-8T/C | HTZ<br>F508del | WT/<br>WT | MK<br>100 bp | HTZ<br>186-8T/C | HTZ<br>F508del | WT/<br>WT | NC<br>EX1-4 | NC<br>W/o EX2 | NC<br>actin |
|--------------|-----------------|----------------|-----------|-----------------|----------------|-----------|--------------|-----------------|----------------|-----------|-------------|---------------|-------------|
|--------------|-----------------|----------------|-----------|-----------------|----------------|-----------|--------------|-----------------|----------------|-----------|-------------|---------------|-------------|

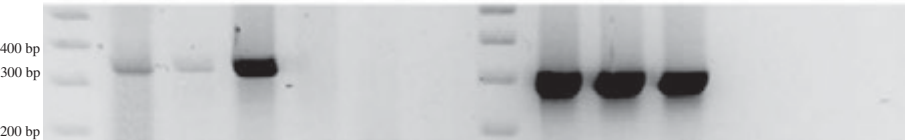

Supplement: MOESM3 [file 9505604]
